# Supplementary material
Source: Research Square preprint supplement (doi:10.21203/rs.3.rs-9627604/v1)
Supplement: Supplementary file 1 [file cd2679e7c00fd4e4b9c96b35.pdf]

## 1 Appendix

2 **Proof of Lemma 1.** We perform a comparative statics analysis on the optimal offset rate  $\delta_{wc}(E, c', c'', Q, m, \alpha)$  by  
3 taking its partial derivatives with respect to each parameter.

4 The partial derivative with respect to the initial industry emissions  $E$  is:

$$\frac{\partial \delta_{wc}(E, c', c'', Q, m, \alpha)}{\partial E} = \frac{1}{n_1 c'' Q (1/n_1 c'' + 1/n_2 m + \alpha/\gamma)} > 0 \quad (\text{A.1})$$

5 The partial derivative with respect to the average initial marginal abatement cost  $c'$  is:

$$\frac{\partial \delta_{wc}(E, c', c'', Q, m, \alpha)}{\partial c'} = \frac{1}{Q (1/n_1 c'' + 1/n_2 m + \alpha/\gamma)} > 0 \quad (\text{A.2})$$

6 The partial derivative with respect to the average abatement technological efficiency parameter  $c''$  is:

$$\frac{\partial \delta_{wc}(E, c', c'', Q, m, \alpha)}{\partial c''} = \frac{c' - (E - Q)/n_2 m - E\alpha/\gamma}{n c''^2 Q (1/n_1 c'' + 1/n_2 m + \alpha/\gamma)^2} \quad (\text{A.3})$$

7 The sign of (A.3) is not immediately apparent. However, under the plausible condition that initial baseline  
8 emissions are sufficiently large ( $E > 2Q$ ), and using the equilibrium condition  $c' \leq (2Q - E)/n_1 c'' + Q/n_2 m + 2Q\alpha/\gamma$   
9 from our model, we can establish the following upper bound for the derivative:

$$\frac{\partial \delta_{wc}(E, c', c'', Q, m, \alpha)}{\partial c''} \leq -\frac{E - 2Q}{n_1 c''^2 Q (1/n_1 c'' + 1/n_2 m + \alpha/\gamma)} \quad (\text{A.4})$$

10 Since the right-hand side of the inequality is negative, it follows that  $\partial \delta_{wc}/\partial c''$  is negative under these conditions.

11 The partial derivative with respect to the initial volume of free carbon allowances  $Q$  is:

$$\frac{\partial \delta_{wc}(E, c', c'', Q, m, \alpha)}{\partial Q} = \frac{-(E + n_1 c' c'')/n_1 c'' Q^2}{1/n_1 c'' + 1/n_2 m + \alpha/\gamma} < 0 \quad (\text{A.5})$$

12 The partial derivative with respect to the average marginal cost of CCER supply  $m$  is:

$$\frac{\partial \delta_{wc}(E, c', c'', Q, m, \alpha)}{\partial m} = \frac{[E - Q + n_1 c' c'']/n_1 c'' Q - \alpha/\gamma}{n_2 m^2 (1/n_1 c'' + 1/n_2 m + \alpha/\gamma)^2} > 0 \quad (\text{A.6})$$

13 Finally, the partial derivative with respect to the government's preference for environmental outcomes  $\alpha$  is:

$$\frac{\partial \delta_{wc}(E, c', c'', Q, m, \alpha)}{\partial \alpha} = -\frac{1/n_1 c'' + \alpha/\gamma + 1/n_2 m + (E - Q + n_1 c' c'')/n_1 c'' - \alpha Q/\gamma}{\gamma (1/n_1 c'' + 1/n_2 m + \alpha/\gamma)^2} < 0 \quad (\text{A.7})$$

14

15 **Proof of Proposition 1.** The optimal threshold  $E^*$  is determined by the first-order condition derived from the  
16 central government's objective function. This condition is:

$$\delta'_{LG,np}(E^*) \int_{E^*}^{\bar{E}} \left[ \frac{\delta_{LG,np}(E^*) Q}{n_2 m} - \frac{E - \delta_{LG,np}(E^*) Q - Q + n_1 c' c''}{n_1 c''} + \alpha_{CG} \frac{(1 + \delta_{LG,na}(E^*)) Q}{\gamma} \right] Q dF(E) = 0 \quad (\text{A.8})$$

17 We note that at the threshold  $E^*$ , the LG's optimal rate  $\delta_{LG,np}(E^*)$  must satisfy its own optimization condition,  
18 which implies:

$$\frac{\delta_{LG,np}(E^*) Q}{n_2 m} - \frac{E - \delta_{LG,np}(E^*) Q - Q + n_1 c' c''}{n_1 c''} + \alpha_{LG} \frac{(1 + \delta_{LG,na}(E^*)) Q}{\gamma} = 0 \quad (\text{A.9})$$

19 Substituting this relationship into the first-order condition (A.8) allows us to simplify the integrand. After  
20 substitution, equation (A.8) becomes:

$$\delta'_{LG,np}(E^*) \left\{ \left[ \frac{E^*}{n_1 c''} + \frac{(\alpha_{CG} - \alpha_{LG})(1 + \delta_{LG,np}(E^*)) Q}{\gamma} \right] (1 - F(E^*)) - \frac{\int_{E^*}^{\bar{E}} E dF(E)}{n_1 c''} \right\} = 0 \quad (\text{A.10})$$

21 Rearranging this final expression yields the condition as stated in Proposition 1.

22

23 **Proof of Proposition 2.** To simplify the exposition, we focus our analysis on the separating equilibrium. The  
24 equations of motion for the state variable for rent,  $\mu(E)$ , and the co-state variable,  $\lambda(E)$ , must satisfy the following  
25 conditions:

$$\mu'(E) = -\frac{\partial L_{A,wp}(E, \delta, R, \mu, \lambda)}{\partial R} = \lambda(E) - \beta^{-1} f(E) \quad (\text{A.11})$$

$$R'(E) = \frac{\partial L_{A,wp}(E, \delta, R, \mu, \lambda)}{\partial \mu} = \frac{(\delta - \delta_{LG,wp})Q}{n_1 c''} \quad (\text{A.12})$$

26 The analysis also requires the following Karush-Kuhn-Tucker (KKT) conditions for the multiplier  $\lambda(E)$ :

$$\frac{\partial L_{A,wp}(E, \delta, R, \mu, \lambda)}{\partial \lambda} = -R(E) \leq 0 \quad (\text{A.13})$$

$$\lambda(E) \geq 0 \quad (\text{A.14})$$

$$\lambda(E) \cdot \frac{\partial L_{A,wp}(E, \delta, R, \mu, \lambda)}{\partial \lambda} = 0 \quad (\text{A.15})$$

27 Since upward distortion (over-reporting) is the dominant incentive problem, the principal would determine  
28 information rent of the lowest-type agent,  $\underline{E}$ . This establishes the transversality condition at the lower boundary:

$$\mu(\underline{E}) = 0 \quad (\text{A.16})$$

29 The information rent for an arbitrary type  $E$  is then found by integrating the equation of motion (A11) from the  
30 lower bound  $\underline{E}$  upwards. Applying the boundary condition  $\mu(\underline{E}) = 0$  and the property  $F(\underline{E}) = 0$  yields:

$$\mu(E) = -\beta^{-1}F(E) + \int_{\underline{E}}^E \lambda(\tilde{E})d\tilde{E} \quad (\text{A.17})$$

31 We define  $\mu_a(E)$  as the value of the rent when the participation constraint for type  $E$  is binding, meaning  $R(E) =$   
32  $0$  and  $\lambda(E) > 0$ . Conversely, if the constraint is slack ( $R(E) > 0$ ), then  $\lambda(E) = 0$ . The optimal path for the co-state  
33 variable  $\mu(E)$  is therefore characterized as follows:

$$\mu(E) = \begin{cases} -\beta^{-1}F(E) & \text{if } \mu_a(E) \leq -\beta^{-1}F(E) \\ \mu_a(E) & \text{if } \mu_a(E) > -\beta^{-1}F(E) \end{cases} \quad (\text{A.18})$$

34 Note that if the participation constraint is binding for an interval of  $E$ , then  $R(E) = 0$  and thus  $R'(E) = 0$  within  
35 that interval. From Eq.(43), we observe that this implies  $\delta_{A,wp} = \delta_{LG,wp}$ . This allows us to derive the expression for  $\mu_a(E)$ :

$$\mu_a(E) = \frac{-(E+n_1c''+n_1c''Q/n_2m)(\alpha_{CG}-\alpha_{LG})/\gamma}{1/n_1c''+1/n_2m+\alpha_{LG}/\gamma} f(E) < 0 \quad (\text{A.19})$$

36 Finally, clarifying the underlying logic is crucial for the monotonicity results in Proposition 2. Since the CG has a  
37 stronger preference for environmental outcomes ( $\alpha_{CG} > \alpha_{LG}$ ), it follows that  $\mu_a(E) < 0$ . This implies that when  $E \rightarrow \underline{E}$ ,  
38 there would exist  $R(E) > 0$ , which means  $\mu(\underline{E}) = 0$ . It also implies the incentive to over-report emissions is the  
39 dominant concern for the principal. To counteract this incentive, the information rent  $R(E)$  must be decreasing in the  
40 agent's type  $E$ . This requires  $R'(E) < 0$ . Assuming a uniform distribution for  $F(E)$ , we obtain the results stated in  
41 Proposition 2.
